# Supplementary material
Source: Springer Nature journal article supplement (https://www.springermedizin.de/resource/supplementary/12963_2007_63_MOESM1_ESM.pdf/9572578)

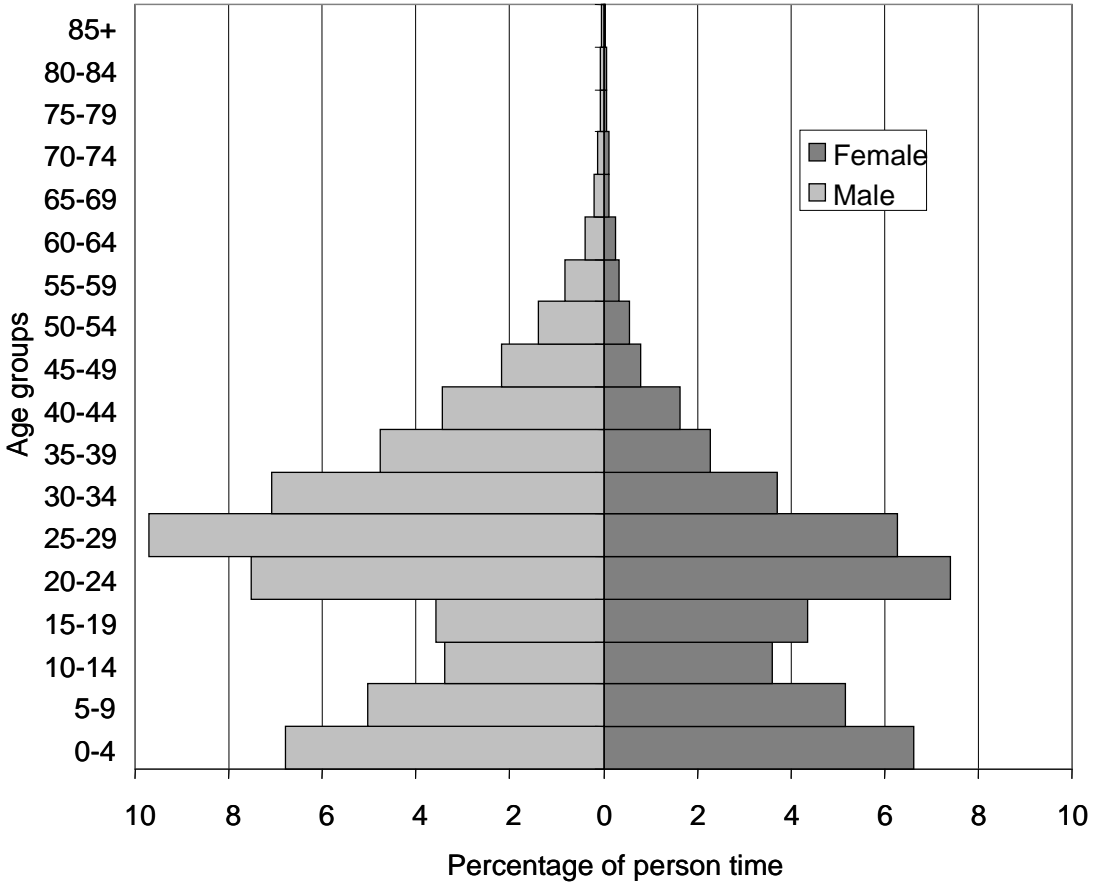

Supplement: MOESM1 [file 9572578]
